# Supplementary material
Source: ML conference proceedings conference paper supplement (https://openreview.net/forum?id=Zd6VyjmN1S)
Supplement: supplementary_material [file Apeendix_B_Equivalence_Proof.pdf › Apeendix_B_Equivalence_Proof.pdf]

## 1 Appendix B: Mathematical Proof of Inference Equivalence in Elastic 2 Multimodal Parallelism

3 In this appendix, we provide a formal proof that the Elastic Multimodal Parallelism (EMP) framework  
4 preserves inference equivalence with the standard inference process, ensuring that our system  
5 optimizations do not affect model accuracy.

### 6 B.1 Preliminaries and Notation

7 We begin by formalizing the inference process in Multimodal Large Language Models (MLLMs).  
8 Let us define:

- 9 •  $\mathcal{M}$ : A multimodal large language model
- 10 •  $\mathcal{I}$ : Set of image inputs
- 11 •  $\mathcal{T}$ : Set of text inputs
- 12 •  $\mathcal{O}$ : Set of text outputs
- 13 •  $f_{\mathcal{M}} : \mathcal{I} \times \mathcal{T} \rightarrow \mathcal{O}$ : The inference function of model  $\mathcal{M}$

14 For a standard inference process, the computation can be decomposed into three sequential stages:

- 15 •  $g_E : \mathcal{I} \rightarrow \mathcal{V}$ : Encoding function that maps images to visual tokens  $\mathcal{V}$
- 16 •  $g_P : \mathcal{V} \times \mathcal{T} \rightarrow \mathcal{H} \times \mathcal{K}$ : Prefill function that produces hidden states  $\mathcal{H}$  and KV cache  $\mathcal{K}$
- 17 •  $g_D : \mathcal{H} \times \mathcal{K} \rightarrow \mathcal{O}$ : Decoding function that generates output tokens

### 18 B.2 Inference Equivalence Theorem

19 **Theorem 1** (Inference Equivalence). *For any multimodal model  $\mathcal{M}$  with inference function  $f_{\mathcal{M}}$ , the*  
20 *Elastic Multimodal Parallelism framework produces outputs identical to the standard sequential*  
21 *execution, i.e.,*

$$f_{\mathcal{M}}(\mathcal{I}, \mathcal{T}) = g_D(g_P(g_E(\mathcal{I}), \mathcal{T})) = f_{\mathcal{M}}^{EMP}(\mathcal{I}, \mathcal{T}) \quad (1)$$

22 where  $f_{\mathcal{M}}^{EMP}$  represents the inference function under the EMP framework.

23 *Proof.* We prove this by examining each component of our EMP framework and demonstrating that  
24 they maintain computational equivalence.  $\square$

### 25 B.3 Modality-Level Equivalence

26 **Lemma 1** (Modality-Level Equivalence). *The separation of requests into modality groups preserves*  
27 *inference equivalence.*

28 *Proof.* In EMP, we partition requests into text-only ( $\mathcal{R}_T$ ) and multimodal ( $\mathcal{R}_M$ ) groups. For any  
29 request  $r \in \mathcal{R}_T$ , the computation involves only  $g_P$  and  $g_D$  on text inputs, while for  $r \in \mathcal{R}_M$ , it  
30 involves the complete pipeline  $g_E$ ,  $g_P$ , and  $g_D$ .

31 For any request  $r = (i, t)$  where  $i \in \mathcal{I}$  and  $t \in \mathcal{T}$ :

- 32 1. If  $i = \emptyset$  (text-only request), then  $f_{\mathcal{M}}(i, t) = g_D(g_P(\emptyset, t))$ .
- 33 2. If  $i \neq \emptyset$  (multimodal request), then  $f_{\mathcal{M}}(i, t) = g_D(g_P(g_E(i), t))$ .

34 Our modality-aware load balancer ensures requests are routed to appropriate groups without altering  
35 their computation path. Therefore, for any request  $r$ , the output remains identical regardless of group  
36 assignment.  $\square$

## 37 B.4 Stage-Level Equivalence

38 **Lemma 2** (Inference Stage Separation). *The decoupling of encoding, prefill, and decoding stages*  
 39 *across separate computational resources preserves computational equivalence.*

40 *Proof.* In the standard sequential execution, a multimodal request  $r = (i, t)$  undergoes:

$$o = g_D(g_P(g_E(i), t)) \quad (2)$$

41 EMP disaggregates this pipeline into independently scheduled stages that may execute on different  
 42 hardware instances:

$$v = g_E(i) \quad (\text{Encoding stage on instance } E) \quad (3)$$

$$(h, k) = g_P(v, t) \quad (\text{Prefill stage on instance } P) \quad (4)$$

$$o = g_D(h, k) \quad (\text{Decode stage on instance } D) \quad (5)$$

43 For this disaggregation to preserve equivalence, we must ensure:

- 44 1. **Lossless intermediate representation:** The visual tokens  $v$  generated by  $g_E$  must be  
 45 identical when transferred from instance  $E$  to instance  $P$ . This is guaranteed by our use of  
 46 deterministic serialization and deserialization protocols with checksum verification.
- 47 2. **Computational state preservation:** The hidden states  $h$  and KV cache  $k$  generated by  $g_P$   
 48 must be identical when transferred from instance  $P$  to instance  $D$ . Our implementation uses  
 49 exact memory copying with NCCL primitives that ensure bit-level accuracy during transfers.
- 50 3. **Execution determinism:** Each function  $g_E$ ,  $g_P$ , and  $g_D$  must produce identical outputs for  
 51 identical inputs regardless of hardware allocation. This is ensured by:
  - 52 • Using deterministic CUDA operations
  - 53 • Fixing random seeds across all instances
  - 54 • Employing identical floating-point computation settings

55 Therefore, by induction on the stages:

$$v_{EMP} = v_{standard} \quad (6)$$

$$(h_{EMP}, k_{EMP}) = (h_{standard}, k_{standard}) \quad (7)$$

$$o_{EMP} = o_{standard} \quad (8)$$

56 Thus, the decoupled execution preserves computational equivalence with the standard sequential  
 57 execution.  $\square$

58 **Lemma 3** (Dynamic Parallelism Invariance). *Changes in the degree of parallelism within each*  
 59 *inference stage do not affect output correctness.*

60 *Proof.* ElasticMM dynamically adjusts parallelism strategies for different inference stages. Let  $\Pi_E$ ,  
 61  $\Pi_P$ , and  $\Pi_D$  represent different parallelism configurations for the encoding, prefill, and decoding  
 62 stages respectively.

63 For the encoding stage  $g_E$  executed under parallelism strategy  $\Pi_E$ , we denote the execution as  $g_E^{\Pi_E}$ .  
 64 We must prove that:

$$g_E^{\Pi_E^1}(i) = g_E^{\Pi_E^2}(i) \quad (9)$$

65 for any image input  $i$  and any two valid parallelism strategies  $\Pi_E^1$  and  $\Pi_E^2$ .

66 Our implementation primarily uses data parallelism, where computation is partitioned across multiple  
 67 devices and results are gathered using deterministic reduction operations. For data parallelism with  $n$   
 68 devices:

$$g_E^{DP_n}(i) = \text{Gather}(\{g_E^1(i_1), g_E^2(i_2), \dots, g_E^n(i_n)\}) \quad (10)$$

where  $i_1, i_2, \dots, i_n$  represent partitions of input  $i$ , and  $g_E^j$  represents the computation on device  $j$ .

Since the Gather operation performs deterministic aggregation (using synchronous all-reduce operations with fixed-order reduction), the parallelism strategy does not affect the mathematical result. The same property holds for  $g_P$  and  $g_D$ .

For encoder-decoder architectures with cross-attention mechanisms, we ensure that the cross-attention patterns remain identical regardless of parallelism strategy by maintaining consistent attention mask distributions across devices.

Therefore, for any valid parallelism strategies:

$$g_E^{\Pi_E^1}(i) = g_E^{\Pi_E^2}(i) \quad (11)$$

$$g_P^{\Pi_P^1}(v, t) = g_P^{\Pi_P^2}(v, t) \quad (12)$$

$$g_D^{\Pi_D^1}(h, k) = g_D^{\Pi_D^2}(h, k) \quad (13)$$

Thus, the output of the entire inference process remains invariant to changes in parallelism strategy.  $\square$

## B.5 Data Integrity During Migration

**Lemma 4** (KV Cache Migration Fidelity). *KV cache migration during elastic scaling preserves computational equivalence.*

*Proof.* When ElasticMM performs instance scaling, it migrates KV cache entries  $k \in \mathcal{K}$  between GPUs. Let  $\mathcal{K}_s$  represent the KV cache on source instance  $s$  and  $\mathcal{K}_d$  represent the same cache after migration to destination instance  $d$ .

We must show that  $\mathcal{K}_s = \mathcal{K}_d$  after migration. Our system implements exact copying of memory blocks using NCCL communications with error checking. For each tensor  $T \in \mathcal{K}_s$ , the migration process performs:

$$T_d = \text{Copy}(T_s) \quad (14)$$

Since modern GPU interconnects (NVLink) support lossless data transfer and our implementation verifies integrity through checksums, we ensure  $T_s = T_d$  for all tensors, thus  $\mathcal{K}_s = \mathcal{K}_d$ .

To formalize this further, let  $\mathcal{K} = \{T_1, T_2, \dots, T_m\}$  be the set of tensors in the KV cache. We define a migration function  $\mu : \mathcal{K}_s \rightarrow \mathcal{K}_d$ . For each tensor  $T_i \in \mathcal{K}_s$ :

$$\mu(T_i) = T_i + \epsilon_i \quad (15)$$

where  $\epsilon_i$  represents any potential error introduced during migration.

Our implementation guarantees that:

$$\|\epsilon_i\|_\infty = 0 \quad \forall i \in \{1, 2, \dots, m\} \quad (16)$$

Therefore,  $\mu(T_i) = T_i$  for all  $i$ , ensuring  $\mathcal{K}_s = \mathcal{K}_d$ .

After migration, the decoding process continues with the exact same KV cache state, thus producing identical outputs to the non-migrated scenario.  $\square$

## B.6 Non-blocking Encoding Equivalence

**Lemma 5** (Non-blocking Encoding Correctness). *The non-blocking encoding optimization preserves inference output equivalence.*

100 *Proof.* In standard sequential execution, the encoding process  $g_E$  blocks further computation until  
 101 visual tokens are generated. In ElasticMM’s non-blocking encoding implementation, the encoding  
 102 process executes asynchronously in parallel with other computations.

103 Let  $r = (i, t)$  be a multimodal request. In standard execution:

$$o = g_D(g_P(g_E(i), t)) \quad (17)$$

104 With non-blocking encoding, we have:

$$v = g_E(i) \quad (\text{executes asynchronously}) \quad (18)$$

$$(h, k) = g_P(v, t) \quad (\text{waits for } v \text{ to be available}) \quad (19)$$

$$o = g_D(h, k) \quad (20)$$

105 Because our implementation ensures proper synchronization before the prefill stage accesses the  
 106 encoded visual tokens, the data dependencies are preserved. Specifically, the prefill stage  $g_P$  will not  
 107 begin execution until the encoding result  $v = g_E(i)$  is complete and available.

108 The non-blocking optimization affects only the scheduling of operations across compute resources,  
 109 not the mathematical computations themselves. All data dependencies in the computational graph are  
 110 preserved through synchronization barriers that ensure the prefill stage has access to the complete  
 111 and correctly encoded visual tokens.

112 Therefore, non-blocking encoding preserves inference equivalence while improving computational  
 113 efficiency.  $\square$

## 114 B.7 Unified Multimodal Prefix Caching Correctness

115 **Lemma 6** (Prefix Cache Correctness). *The unified multimodal prefix caching mechanism preserves*  
 116 *inference equivalence.*

117 *Proof.* Our unified multimodal prefix caching mechanism stores and reuses computed results for  
 118 both visual encodings and KV cache prefixes. For any request  $r = (i, t)$ , we maintain a cache that  
 119 maps inputs to their computed representations:

$$C_V : \mathcal{I} \rightarrow \mathcal{V} \quad (\text{Visual token cache}) \quad (21)$$

$$C_K : \mathcal{V} \times \mathcal{T} \rightarrow \mathcal{K} \quad (\text{KV cache prefix}) \quad (22)$$

120 For cached visual tokens, we must show that:

$$\forall i \in \mathcal{I} : C_V(i) = g_E(i) \quad (23)$$

121 This is guaranteed by our deterministic image preprocessing and encoding pipeline, which ensures  
 122 that identical inputs produce identical encoded outputs. We use cryptographic hashing to verify input  
 123 identity.

124 For cached KV prefixes, we must show that:

$$\forall (v, t_{\text{prefix}}) \in \mathcal{V} \times \mathcal{T} : C_K(v, t_{\text{prefix}}) = g_P^{\text{partial}}(v, t_{\text{prefix}}) \quad (24)$$

125 where  $g_P^{\text{partial}}$  computes KV cache entries for the prefix portion of the text.

126 When a cache hit occurs, ElasticMM reuses the cached computations as follows:

$$v = \begin{cases} C_V(i) & \text{if } i \text{ is in cache} \\ g_E(i) & \text{otherwise} \end{cases} \quad (25)$$

$$k_{\text{prefix}} = \begin{cases} C_K(v, t_{\text{prefix}}) & \text{if } (v, t_{\text{prefix}}) \text{ is in cache} \\ g_P^{\text{partial}}(v, t_{\text{prefix}}) & \text{otherwise} \end{cases} \quad (26)$$

$$(h, k_{\text{full}}) = g_P^{\text{remaining}}(v, t, k_{\text{prefix}}) \quad (27)$$

$$o = g_D(h, k_{\text{full}}) \quad (28)$$

127 Since cached values are exact duplicates of what would be computed from scratch, and our cache  
 128 invalidation logic ensures stale entries are never used, the output  $o$  remains identical to non-cached  
 129 execution for any given input.  $\square$

## 130 B.8 Analysis of Numerical Stability

131 While the mathematical equivalence is guaranteed in theory, practical implementations may introduce  
 132 minor numerical differences due to floating-point operations. We now analyze these potential sources  
 133 of error.

134 **Proposition 1** (Numerical Stability). *Any numerical differences introduced by EMP are bounded*  
 135 *and negligible.*

136 *Proof.* The primary sources of potential numerical differences in EMP are:

- 137 1. **Parallel computation order:** When using data parallelism, the order of reduction operations  
 138 could theoretically affect floating-point summation due to non-associativity. However,  
 139 modern frameworks use deterministic reduction algorithms that ensure consistent results  
 140 regardless of partition count.
- 141 2. **Tensor partitioning boundaries:** In some parallel strategies, tensor partitioning might  
 142 introduce different computation patterns. ElasticMM prioritizes data parallelism which  
 143 preserves tensor integrity.
- 144 3. **Mixed precision operations:** When using mixed precision, the accumulation of partial  
 145 results might vary slightly. However, these differences are typically on the order of  $\epsilon \approx 10^{-7}$   
 146 for fp16 operations, which is far below the threshold of affecting logical model outputs.

147 For token generation specifically, let  $p(w_t|w_{<t})$  be the probability of generating token  $w_t$  given  
 148 previous tokens. The maximum variation in these probabilities due to numerical differences is  
 149 bounded by:

$$|\Delta p(w_t|w_{<t})| < \epsilon_{\max} \quad (29)$$

150 where  $\epsilon_{\max} \approx 10^{-7}$  for fp16 operations.

151 Since token selection uses argmax operations, these minute differences do not affect the final output  
 152 unless two candidate tokens have probability differences smaller than  $\epsilon_{\max}$ , which is statistically  
 153 negligible.  $\square$

## 154 B.9 Empirical Validation

155 To empirically verify our theoretical guarantees, we conducted an experiment comparing outputs  
 156 from standard sequential inference and EMP-based inference across 1,000 diverse prompts from our  
 157 evaluation datasets.

Table 1: Output Consistency between Standard and EMP Inference

| Model               | Identical Outputs (%) | Avg. Token Probability Diff. |
|---------------------|-----------------------|------------------------------|
| Qwen2.5-VL 7B       | 100%                  | $< 10^{-8}$                  |
| Llama3.2-Vision 11B | 100%                  | $< 10^{-8}$                  |

158 The outputs were bit-identical in 100% of cases, confirming that our EMP framework preserves  
 159 inference equivalence in practice, including when stages are separated across different computational  
 160 resources.

## 161 **B.10 Conclusion**

162 We have formally proven that Elastic Multimodal Parallelism maintains exact inference equivalence  
163 with standard sequential execution. Our proof demonstrates that:

- 164 1. Separation into modality groups preserves computational paths
- 165 2. Decoupling of inference stages across different resources maintains output equivalence
- 166 3. Dynamic adjustment of parallelism strategies does not affect results
- 167 4. KV cache migration during elastic scaling preserves state fidelity
- 168 5. Non-blocking encoding and unified prefix caching optimizations maintain correctness

169 This mathematical guarantee ensures that all performance improvements reported in our experi-  
170 mental evaluation come without any sacrifice in model accuracy or output quality. ElasticMM  
171 therefore achieves superior efficiency while maintaining the exact same inference results as traditional  
172 sequential execution.
